# Supplementary material for: Effective Moment Feature Vectors for Protein Domain Structures
Source: PLoS One. 2013 Dec 31;8(12):e83788. doi: 10.1371/journal.pone.0083788 (PMC3877117; doi:10.1371/journal.pone.0083788)
Supplement: Score S1 — Alignment Scores of Domains. (XLSX) [file pone.0083788.s011.xlsx]

## Sheet: a.60.9-Score
-	'd1f44a1'	'd1xo0a1'	'd1xo0b1'	'd4crxa1'	'd4crxb1'	'd1kbua1'	'd1kbub1'	'd1crxa1'	'd1crxb1'	'd2hofa1'	'd2hofb1'	'd2hoia1'	'd2hoib1'	'd2hoig1'	'd2hoih1'	'd2crxa1'	'd2crxb1'	'd1drga1'	'd1pvpa1'	'd1pvpb1'	'd3crxa1'	'd3crxb1'	'd1ma7a1'	'd1ma7b1'	'd1pvra1'	'd1pvrb1'	'd1xnsa1'	'd1xnsb1'	'd1q3ua1'	'd1q3ub1'	'd1q3ue1'	'd1q3uf1'	'd5crxa1'	'd5crxb1'	'd1nzba1'	'd1nzbb1'	'd1nzbe1'	'd1nzbf1'	'd1pvqa1'	'd1pvqb1'	'd1q3va1'	'd1q3vb1'	'd1q3ve1'	'd1q3vf1'	'd1ouqa1'	'd1ouqb1'	'd1ouqe1'	'd1ouqf1'	'd1p4ea1'
d1f44a1	0	294.75	296.41	295.06	295.4	294.57	296.27	294.52	296.24	295.46	296.28	295.72	296.5	295.6	296.12	294.39	295.82	303.04	294.41	295.49	294.47	295.63	294.5	295.51	294.5	296.1	294.52	296.25	295.66	295.66	294.32	295.54	295.15	295.26	295.3	295.35	294.12	294.93	294.57	295.43	294.47	295.48	293.69	295.36	294.56	295.01	293.74	295.18	114.79
d1xo0a1	0	0	311.31	311.74	311.28	311.68	311.1	311.43	311.19	311.57	311.12	311.48	311.07	311.55	311.18	311.28	311.09	293.17	311.62	310.96	311.51	311.18	311.49	311.24	311.6	311.03	311.47	310.86	311.38	311.06	311.43	311.04	311.03	310.79	311.04	310.96	311	310.92	311.55	311.02	311.16	311.01	311.02	310.96	310.88	310.78	310.74	310.74	116.07
d1xo0b1	0	0	0	311.28	311.74	311.28	311.65	310.74	311.76	311.29	311.71	311.47	311.65	311.43	311.67	310.71	311.54	294.95	311.25	311.57	311.23	311.64	310.96	311.77	311.16	311.62	310.9	311.62	311.23	311.4	311.14	311.44	310.4	311.25	310.84	311.17	310.7	311.28	311.12	311.57	311.18	311.32	310.71	311.32	310.87	311.13	310.33	311.13	115.66
d4crxa1	0	0	0	0	311.3	311.65	311.03	311.35	311.21	311.67	311.13	311.57	311.13	311.65	311.08	311.14	311.09	293.52	311.63	311.01	311.42	311.16	311.4	311.26	311.6	310.98	311.39	310.98	311.36	311.04	311.46	311.05	310.88	310.62	310.97	310.89	310.92	310.96	311.49	311.06	311.13	311.01	311.02	310.92	310.91	310.81	310.64	310.65	116.43
d4crxb1	0	0	0	0	0	311.27	311.56	310.78	311.66	311.13	311.69	311.39	311.62	311.24	311.64	310.72	311.48	293.99	311.25	311.56	311.22	311.55	310.9	311.65	311.15	311.57	310.9	311.53	311.12	311.37	311.18	311.45	310.44	311.16	310.81	311.25	310.77	311.18	311.03	311.59	311.1	311.31	310.69	311.32	310.77	311.11	310.22	311.06	116.19
d1kbua1	0	0	0	0	0	0	311.04	311.2	311.16	311.48	311.14	311.42	311.16	311.46	311.14	310.95	311.22	293.63	311.76	311.08	311.32	311.22	311.47	311.33	311.71	311.02	311.26	311.04	311.3	311.1	311.26	311.16	310.83	310.87	310.97	310.92	310.86	311.15	311.63	311.02	311.16	310.98	310.72	311.05	310.82	310.71	310.36	310.81	116.96
d1kbub1	0	0	0	0	0	0	0	310.41	311.61	311.02	311.6	311.15	311.42	311.04	311.52	310.51	311.33	294.67	310.97	311.67	311.09	311.39	310.8	311.68	310.9	311.78	310.74	311.49	311.04	311.25	310.97	311.34	310.21	310.98	310.84	311.07	310.42	311.1	310.98	311.77	311.11	311.2	310.42	311.21	310.68	311.02	310.04	311.05	115.21
d1crxa1	0	0	0	0	0	0	0	0	310.75	311.06	310.56	311.01	310.61	311.12	310.55	311.11	310.75	292.96	311.15	310.59	310.99	310.7	311.12	310.72	311.23	310.42	311.36	310.43	311.05	310.78	311.2	310.59	311.34	310.5	310.63	310.67	310.55	310.57	311.04	310.57	310.77	310.72	310.72	310.36	310.3	310.51	310.36	310.1	116.88
d1crxb1	0	0	0	0	0	0	0	0	0	311.21	311.6	311.35	311.56	311.31	311.6	310.74	311.44	294.38	311.17	311.54	311.21	311.48	310.95	311.7	311.08	311.61	311	311.54	311.12	311.27	311.06	311.33	310.4	311.28	310.86	311.12	310.6	311.1	311.11	311.52	311.09	311.24	310.66	311.17	310.75	310.99	310.24	310.88	114.77
d2hofa1	0	0	0	0	0	0	0	0	0	0	311.25	311.63	311.19	311.63	311.2	310.89	310.99	294	311.51	310.94	311.29	311.07	311.27	311.22	311.48	310.91	311.39	311.07	311.26	310.99	311.27	310.99	310.67	310.52	310.89	310.86	310.82	310.86	311.44	311	311.07	310.85	310.91	310.85	310.79	310.71	310.54	310.65	116.98
d2hofb1	0	0	0	0	0	0	0	0	0	0	0	311.32	311.63	311.23	311.66	310.64	311.36	294.72	311.13	311.46	311.15	311.51	310.89	311.67	311.02	311.57	310.84	311.65	310.97	311.34	310.92	311.44	310.13	311.09	310.68	311.05	310.5	311.18	311	311.52	310.89	311.09	310.51	311.29	310.6	310.9	310.08	311.05	116
d2hoia1	0	0	0	0	0	0	0	0	0	0	0	0	311.37	311.8	311.39	310.77	311.03	294.49	311.42	311.13	311.34	311.07	311.16	311.34	311.37	311.12	311.26	311.09	311.26	311.13	311.3	311.12	310.7	310.72	310.88	310.94	310.94	310.94	311.25	311.13	311.07	310.92	310.88	311.03	310.76	310.76	310.59	310.78	116.85
d2hoib1	0	0	0	0	0	0	0	0	0	0	0	0	0	311.28	311.86	310.55	311.39	295.1	311.12	311.47	311.14	311.42	310.83	311.6	310.99	311.43	310.82	311.47	310.96	311.4	310.95	311.55	310.28	311.13	310.71	311.24	310.49	311.32	310.98	311.42	311	311.19	310.49	311.38	310.69	310.97	310.18	311.05	113.81
d2hoig1	0	0	0	0	0	0	0	0	0	0	0	0	0	0	311.24	310.88	311.01	294.27	311.48	311.09	311.33	311.06	311.3	311.28	311.42	310.97	311.31	311	311.25	311.06	311.28	311.07	310.75	310.65	310.9	310.87	310.88	310.86	311.31	311.05	311.06	310.92	310.92	310.95	310.71	310.66	310.58	310.76	117.93
d2hoih1	0	0	0	0	0	0	0	0	0	0	0	0	0	0	0	310.67	311.3	295.23	311.08	311.44	311.14	311.33	310.83	311.63	310.97	311.48	310.86	311.49	311.09	311.39	311.01	311.46	310.27	311.06	310.76	311.22	310.6	311.23	311.09	311.42	311.04	311.11	310.61	311.3	310.71	310.97	310.29	311.08	114.92
d2crxa1	0	0	0	0	0	0	0	0	0	0	0	0	0	0	0	0	310.52	292.48	311.07	310.38	311.01	310.61	311.03	310.64	311.01	310.43	311.2	310.36	310.8	310.43	310.9	310.49	310.88	310.29	310.64	310.43	310.46	310.36	311.02	310.52	310.54	310.42	310.72	310.35	310.26	310.26	310.46	309.97	114.99
d2crxb1	0	0	0	0	0	0	0	0	0	0	0	0	0	0	0	0	0	294.01	311.14	311.33	310.89	311.58	310.91	311.59	311.08	311.34	310.81	311.41	310.97	311.31	311.04	311.37	310.55	311.04	310.7	311.18	310.27	311.28	310.99	311.43	311.11	311.28	310.53	311.31	310.66	311.11	310.24	311.08	115.82
d1drga1	0	0	0	0	0	0	0	0	0	0	0	0	0	0	0	0	0	0	293.42	293.85	292.7	294.08	293.34	293.89	293.33	294.36	292.97	294.74	293.53	294.78	293.49	294.44	293.1	293.4	292.89	294.31	293.1	293.66	293.4	294.44	293.14	294.08	292.85	293.83	293.44	293.61	292.65	293.72	110.3
d1pvpa1	0	0	0	0	0	0	0	0	0	0	0	0	0	0	0	0	0	0	0	311.02	311.31	311.23	311.52	311.34	311.73	311	311.26	310.99	311.29	311.12	311.29	311.1	310.81	310.8	310.93	310.89	310.86	310.89	311.74	311.02	311.13	310.89	310.82	310.91	310.82	310.65	310.43	310.66	116
d1pvpb1	0	0	0	0	0	0	0	0	0	0	0	0	0	0	0	0	0	0	0	0	311.1	311.41	310.72	311.64	310.99	311.74	310.65	311.49	311.05	311.24	311.01	311.4	310.19	311.01	310.75	311.14	310.4	311.16	310.99	311.69	311.09	311.24	310.49	311.23	310.62	310.97	310.03	311.02	117.8
d3crxa1	0	0	0	0	0	0	0	0	0	0	0	0	0	0	0	0	0	0	0	0	0	311.21	311.14	311.2	311.22	311.01	311.16	310.96	311.2	310.97	311.13	311.02	310.62	310.96	310.95	310.81	310.72	310.79	311.28	310.96	311.05	310.73	310.79	310.86	310.82	310.67	310.51	310.55	118.82
d3crxb1	0	0	0	0	0	0	0	0	0	0	0	0	0	0	0	0	0	0	0	0	0	0	310.99	311.57	311.13	311.45	310.95	311.53	311.06	311.3	311.1	311.35	310.52	311.23	310.79	311.09	310.47	311.12	311.16	311.41	311.13	311.25	310.71	311.23	310.94	311.15	310.33	310.98	116.01
d1ma7a1	0	0	0	0	0	0	0	0	0	0	0	0	0	0	0	0	0	0	0	0	0	0	0	311.12	311.53	310.73	311.29	310.71	311.21	310.97	311.14	310.96	311.02	310.58	310.86	310.56	310.67	310.78	311.52	310.83	310.97	310.69	310.66	310.73	310.68	310.37	310.32	310.47	116.34
d1ma7b1	0	0	0	0	0	0	0	0	0	0	0	0	0	0	0	0	0	0	0	0	0	0	0	0	311.17	311.72	310.93	311.59	311.06	311.41	311.06	311.59	310.39	311.2	310.76	311.2	310.56	311.35	311.17	311.63	311.05	311.33	310.64	311.43	310.62	311.06	310.19	311.17	117.06
d1pvra1	0	0	0	0	0	0	0	0	0	0	0	0	0	0	0	0	0	0	0	0	0	0	0	0	0	310.98	311.32	310.97	311.27	311	311.24	311.03	310.88	310.71	310.93	310.88	310.77	310.91	311.71	310.93	311.16	310.92	310.88	310.93	310.79	310.62	310.51	310.68	115.13
d1pvrb1	0	0	0	0	0	0	0	0	0	0	0	0	0	0	0	0	0	0	0	0	0	0	0	0	0	0	310.64	311.53	311	311.15	310.86	311.29	310.06	311.01	310.74	310.99	310.39	310.99	310.94	311.76	311	311.11	310.45	311.2	310.56	310.9	310	311.03	116.24
d1xnsa1	0	0	0	0	0	0	0	0	0	0	0	0	0	0	0	0	0	0	0	0	0	0	0	0	0	0	0	310.71	311.21	310.78	311.21	310.81	311.08	310.55	310.96	310.64	310.64	310.79	311.13	310.72	310.97	310.71	310.99	310.62	310.58	310.52	310.76	310.3	115.54
d1xnsb1	0	0	0	0	0	0	0	0	0	0	0	0	0	0	0	0	0	0	0	0	0	0	0	0	0	0	0	0	310.88	311.21	310.82	311.37	310.05	311.13	310.58	311.01	310.26	311.12	310.81	311.44	311	311.01	310.26	311.18	310.64	310.93	309.89	310.97	114.69
d1q3ua1	0	0	0	0	0	0	0	0	0	0	0	0	0	0	0	0	0	0	0	0	0	0	0	0	0	0	0	0	0	310.89	311.37	311.01	310.67	310.61	335.47	310.79	310.78	310.86	311.22	310.97	335.22	310.97	310.89	310.77	334.62	310.82	310.57	310.54	124.45
d1q3ub1	0	0	0	0	0	0	0	0	0	0	0	0	0	0	0	0	0	0	0	0	0	0	0	0	0	0	0	0	0	0	310.9	311.49	310.35	311.07	310.69	311.4	310.47	311.32	310.88	311.22	310.93	311.43	310.49	311.28	310.58	311.11	310.12	310.92	116.13
d1q3ue1	0	0	0	0	0	0	0	0	0	0	0	0	0	0	0	0	0	0	0	0	0	0	0	0	0	0	0	0	0	0	0	310.98	310.76	310.76	310.94	310.91	311.18	310.77	311.18	310.99	311.28	311.04	311.39	310.76	310.87	310.98	310.95	310.48	118.13
d1q3uf1	0	0	0	0	0	0	0	0	0	0	0	0	0	0	0	0	0	0	0	0	0	0	0	0	0	0	0	0	0	0	0	0	310.31	311.06	310.8	311.04	310.43	311.62	310.97	311.42	311.09	311.16	310.42	311.69	310.7	310.89	309.91	311.34	116.34
d5crxa1	0	0	0	0	0	0	0	0	0	0	0	0	0	0	0	0	0	0	0	0	0	0	0	0	0	0	0	0	0	0	0	0	0	310.34	310.32	310.12	310.15	310.32	310.72	310.25	310.5	310.28	310.27	310.16	310.16	310.1	310.13	309.87	118.59
d5crxb1	0	0	0	0	0	0	0	0	0	0	0	0	0	0	0	0	0	0	0	0	0	0	0	0	0	0	0	0	0	0	0	0	0	0	310.44	310.76	310.17	310.88	310.58	310.95	310.68	311	310.39	310.99	310.36	310.65	309.87	310.45	116.33
d1nzba1	0	0	0	0	0	0	0	0	0	0	0	0	0	0	0	0	0	0	0	0	0	0	0	0	0	0	0	0	0	0	0	0	0	0	0	310.65	310.57	310.67	310.82	310.63	335.4	310.76	310.55	310.66	335.06	310.6	310.54	310.48	123.39
d1nzbb1	0	0	0	0	0	0	0	0	0	0	0	0	0	0	0	0	0	0	0	0	0	0	0	0	0	0	0	0	0	0	0	0	0	0	0	0	310.52	310.97	310.74	311.06	310.88	311.41	310.58	310.94	310.54	311.3	310.31	310.69	119.62
d1nzbe1	0	0	0	0	0	0	0	0	0	0	0	0	0	0	0	0	0	0	0	0	0	0	0	0	0	0	0	0	0	0	0	0	0	0	0	0	0	310.27	310.67	310.29	310.67	310.56	311.14	310.39	310.3	310.43	310.78	310.23	114.57
d1nzbf1	0	0	0	0	0	0	0	0	0	0	0	0	0	0	0	0	0	0	0	0	0	0	0	0	0	0	0	0	0	0	0	0	0	0	0	0	0	0	310.83	311.09	310.93	311.05	310.16	311.47	310.76	310.66	309.84	311.24	118.82
d1pvqa1	0	0	0	0	0	0	0	0	0	0	0	0	0	0	0	0	0	0	0	0	0	0	0	0	0	0	0	0	0	0	0	0	0	0	0	0	0	0	0	310.9	311.07	310.81	310.77	310.85	310.8	310.57	310.44	310.59	115.83
d1pvqb1	0	0	0	0	0	0	0	0	0	0	0	0	0	0	0	0	0	0	0	0	0	0	0	0	0	0	0	0	0	0	0	0	0	0	0	0	0	0	0	0	311.02	311.26	310.56	311.26	310.45	310.99	310.04	311	116.38
d1q3va1	0	0	0	0	0	0	0	0	0	0	0	0	0	0	0	0	0	0	0	0	0	0	0	0	0	0	0	0	0	0	0	0	0	0	0	0	0	0	0	0	0	311.04	310.71	310.95	335.52	310.86	310.4	310.7	123.1
d1q3vb1	0	0	0	0	0	0	0	0	0	0	0	0	0	0	0	0	0	0	0	0	0	0	0	0	0	0	0	0	0	0	0	0	0	0	0	0	0	0	0	0	0	0	310.54	311.13	310.63	311.62	310.03	310.89	119.41
d1q3ve1	0	0	0	0	0	0	0	0	0	0	0	0	0	0	0	0	0	0	0	0	0	0	0	0	0	0	0	0	0	0	0	0	0	0	0	0	0	0	0	0	0	0	0	310.38	310.31	310.38	311.6	310.05	116.81
d1q3vf1	0	0	0	0	0	0	0	0	0	0	0	0	0	0	0	0	0	0	0	0	0	0	0	0	0	0	0	0	0	0	0	0	0	0	0	0	0	0	0	0	0	0	0	0	310.57	310.82	309.88	311.54	116.19
d1ouqa1	0	0	0	0	0	0	0	0	0	0	0	0	0	0	0	0	0	0	0	0	0	0	0	0	0	0	0	0	0	0	0	0	0	0	0	0	0	0	0	0	0	0	0	0	0	310.55	310.28	310.33	124.06
d1ouqb1	0	0	0	0	0	0	0	0	0	0	0	0	0	0	0	0	0	0	0	0	0	0	0	0	0	0	0	0	0	0	0	0	0	0	0	0	0	0	0	0	0	0	0	0	0	0	310.06	310.46	120.38
d1ouqe1	0	0	0	0	0	0	0	0	0	0	0	0	0	0	0	0	0	0	0	0	0	0	0	0	0	0	0	0	0	0	0	0	0	0	0	0	0	0	0	0	0	0	0	0	0	0	0	309.65	115.85
d1ouqf1	0	0	0	0	0	0	0	0	0	0	0	0	0	0	0	0	0	0	0	0	0	0	0	0	0	0	0	0	0	0	0	0	0	0	0	0	0	0	0	0	0	0	0	0	0	0	0	0	115.65
d1p4ea1	0	0	0	0	0	0	0	0	0	0	0	0	0	0	0	0	0	0	0	0	0	0	0	0	0	0	0	0	0	0	0	0	0	0	0	0	0	0	0	0	0	0	0	0	0	0	0	0	0
d1p4eb1	0	0	0	0	0	0	0	0	0	0	0	0	0	0	0	0	0	0	0	0	0	0	0	0	0	0	0	0	0	0	0	0	0	0	0	0	0	0	0	0	0	0	0	0	0	0	0	0	0
d1p4ec1	0	0	0	0	0	0	0	0	0	0	0	0	0	0	0	0	0	0	0	0	0	0	0	0	0	0	0	0	0	0	0	0	0	0	0	0	0	0	0	0	0	0	0	0	0	0	0	0	0
d1p4ed1	0	0	0	0	0	0	0	0	0	0	0	0	0	0	0	0	0	0	0	0	0	0	0	0	0	0	0	0	0	0	0	0	0	0	0	0	0	0	0	0	0	0	0	0	0	0	0	0	0
d1floa1	0	0	0	0	0	0	0	0	0	0	0	0	0	0	0	0	0	0	0	0	0	0	0	0	0	0	0	0	0	0	0	0	0	0	0	0	0	0	0	0	0	0	0	0	0	0	0	0	0
d1flob1	0	0	0	0	0	0	0	0	0	0	0	0	0	0	0	0	0	0	0	0	0	0	0	0	0	0	0	0	0	0	0	0	0	0	0	0	0	0	0	0	0	0	0	0	0	0	0	0	0
d1floc1	0	0	0	0	0	0	0	0	0	0	0	0	0	0	0	0	0	0	0	0	0	0	0	0	0	0	0	0	0	0	0	0	0	0	0	0	0	0	0	0	0	0	0	0	0	0	0	0	0
d1flod1	0	0	0	0	0	0	0	0	0	0	0	0	0	0	0	0	0	0	0	0	0	0	0	0	0	0	0	0	0	0	0	0	0	0	0	0	0	0	0	0	0	0	0	0	0	0	0	0	0
d1m6xa1	0	0	0	0	0	0	0	0	0	0	0	0	0	0	0	0	0	0	0	0	0	0	0	0	0	0	0	0	0	0	0	0	0	0	0	0	0	0	0	0	0	0	0	0	0	0	0	0	0
d1m6xb1	0	0	0	0	0	0	0	0	0	0	0	0	0	0	0	0	0	0	0	0	0	0	0	0	0	0	0	0	0	0	0	0	0	0	0	0	0	0	0	0	0	0	0	0	0	0	0	0	0
d1m6xc1	0	0	0	0	0	0	0	0	0	0	0	0	0	0	0	0	0	0	0	0	0	0	0	0	0	0	0	0	0	0	0	0	0	0	0	0	0	0	0	0	0	0	0	0	0	0	0	0	0
d1m6xd1	0	0	0	0	0	0	0	0	0	0	0	0	0	0	0	0	0	0	0	0	0	0	0	0	0	0	0	0	0	0	0	0	0	0	0	0	0	0	0	0	0	0	0	0	0	0	0	0	0
d1a0pa1	0	0	0	0	0	0	0	0	0	0	0	0	0	0	0	0	0	0	0	0	0	0	0	0	0	0	0	0	0	0	0	0	0	0	0	0	0	0	0	0	0	0	0	0	0	0	0	0	0
		red		green		blue
	red	min	292.48	min	106.41	min	153.82
		max	335.52	max	128.05	max	177.25
	green			min	313.57	min	114.83
				max	359.92	max	123.53
	blue(only 1 domain)					min	MAX SCORE
						max	MAX SCORE
[truncated: 12 more columns]

## Sheet: a.69.1-Score
-	'd1skyb1'	'd2jdia1'	'd2jdib1'	'd2jdic1'	'd2ck3a1'	'd2ck3b1'	'd2ck3c1'	'd1w0ja1'	'd1w0jb1'	'd1w0jc1'	'd1e79a1'	'd1e79b1'	'd1e79c1'	'd1w0ka1'	'd1w0kb1'	'd1w0kc1'	'd1h8ea1'	'd1h8eb1'	'd1h8ec1'	'd1e1ra1'	'd1e1rb1'	'd1e1rc1'	'd1bmfa1'	'd1bmfb1'	'd1bmfc1'	'd1nbma1'	'd1nbmb1'	'd1nbmc1'	'd1e1qa1'	'd1e1qb1'	'd1e1qc1'	'd1efra1'	'd1efrb1'	'd1efrc1'	'd1h8ha1'	'd1h8hb1'	'd1h8hc1'	'd1ohha1'	'd1ohhb1'	'd1ohhc1'	'd1cowa1'	'd1cowb1'	'd1cowc1'	'd1maba1'	'd2f43a1'	'd1fx0a1'	'd1kmha1'	'd1skye1'	'd1w0jd1'
d1skyb1	0	324.8	326.33	326.77	321.28	326.39	326.96	325.43	326.71	326.81	324.67	326.27	326.72	325	327.41	326.73	325.43	326.38	325.81	325.58	326.58	325.2	325.31	328.36	324.87	324.83	330.15	325.28	324.73	326.53	324.92	325.36	328.08	324.7	324.63	326.44	325.03	324.19	326.46	316.16	325.03	328.41	324.75	272.52	248.1	320.7	319.45	176.55	177.48
d2jdia1	0	0	329.83	351.82	383.2	329.97	355.11	382.52	330.78	357.77	382.72	362.73	350.98	381.78	329.39	353.15	354.77	330.27	348.71	381.77	330.16	353.83	376.8	339.2	360.39	377.69	329.86	352.59	377.03	330.14	353.53	377.32	339.46	359.79	376.96	330.19	353.49	380.69	329.8	354.62	381.03	340.64	361.25	333.39	315.74	374.6	374.24	199.73	203.18
d2jdib1	0	0	0	327.73	329.8	359.29	327.35	329.47	358.68	327.81	329.79	329.84	327.67	329.66	358.26	327.7	332.42	358.1	329.45	329.72	358.38	328.08	329.91	329.61	327.52	328.92	329.41	326.77	329.68	358.11	326.99	329.99	329.6	327.58	329.57	358.18	327.07	328.44	357.93	328.04	329.67	329.49	327.38	293.77	272.25	328.56	328.19	169.87	173.97
d2jdic1	0	0	0	0	357.55	327.52	383.7	356.17	328.43	383.15	354.44	334.24	382.87	360.34	327.66	382.47	337.9	324.04	357.43	359.33	321.42	381.61	360.1	335.15	378.25	358.38	331.83	381.38	363.68	328.36	382.04	358.94	335.41	379.15	363.69	328.3	381.99	352.66	328.53	354.78	357.13	333.34	380.44	332.51	310.49	346.06	346.88	190.33	199.33
d2ck3a1	0	0	0	0	0	329.89	359.91	382.36	330.59	365.27	382.73	363.42	354.81	381.83	329.61	358.19	354.4	330.14	349.4	381.89	329.53	353.62	381.51	340.27	364.25	380.65	331.39	355.23	381.35	330.04	357.05	381.58	340.55	363.28	381.3	330.05	356.2	380.46	329.71	354.42	381.34	341.55	363.8	339.68	319.85	377.56	380.04	201.42	202.23
d2ck3b1	0	0	0	0	0	0	327.77	329.62	358.74	327.76	330.14	329.73	327.58	329.84	358.21	327.72	332.52	358.26	329.36	329.91	358.2	328.05	330.07	330.23	327.54	329.11	329.49	326.81	329.39	358.25	327.42	330.17	330.26	327.57	329.29	358.29	327.47	327.79	358.24	328.21	329.99	330.15	327.36	291.19	267.5	328.65	328.31	170	174.58
d2ck3c1	0	0	0	0	0	0	0	356.79	328.59	383.28	356.86	333.2	383.04	361.2	327.8	382.86	336.39	323.3	357.45	361.17	321.08	381.88	363.25	335.9	382.23	360.66	330.5	381.6	363.88	328.49	382.34	361.81	336.21	382.32	363.82	328.43	382.33	354.23	328.68	354.35	359.53	334.26	381.97	334.74	312.51	348.27	349.09	190.39	198.16
d1w0ja1	0	0	0	0	0	0	0	0	330.5	365.85	382.89	363.29	352.22	382.93	329.11	357.42	355.2	329.9	343.6	382.53	330.09	350.53	382.13	340.15	364.18	381.69	332.53	355.31	382.42	330	356.71	382.2	340.52	363.78	382.43	330.07	356.68	381.59	329.75	350.43	382.13	340.95	364.18	325.1	303.05	380.3	380.32	205.6	202.94
d1w0jb1	0	0	0	0	0	0	0	0	0	328.55	330.72	330.31	328.43	330.45	358.26	328.33	333.32	358.8	330.18	330.66	358.57	328.83	330.79	330.44	328.28	330.09	329.83	327.62	330.61	358.25	328.04	330.91	330.51	328.33	330.59	358.36	328.11	329.7	358.15	329.09	330.64	330.35	328.14	296.19	271.63	329.01	328.7	172.27	178.01
d1w0jc1	0	0	0	0	0	0	0	0	0	0	365.49	333.78	382.72	368.79	327.58	382.91	340.69	326.37	357.52	369.13	323.52	382.78	368.12	332.76	382.61	367.65	327.3	381.58	367.35	328.69	382.42	367.39	333.07	382.68	367.12	328.63	382.4	362.31	328.63	354.52	367.68	332.28	382.46	334.78	313.38	355.08	356.25	190.83	199.89
d1e79a1	0	0	0	0	0	0	0	0	0	0	0	363.46	351.93	382.34	329.56	356.51	354.67	330.14	343.26	382.25	330.24	353.28	381.99	338.61	365.25	381.6	330.72	356.96	381.86	330.25	357.02	382.06	338.92	365.47	381.85	330.29	356.47	381.27	329.78	354.96	381.97	339.09	367.41	335.92	313.39	379.63	379.64	200.63	202.76
d1e79b1	0	0	0	0	0	0	0	0	0	0	0	0	335.2	361.61	329.93	331.13	348.49	330.29	330.4	357.66	329.82	332.87	357.2	335.24	332.44	355.9	332.17	329.79	353.24	329.57	332.03	357.3	335.37	332.39	353.23	329.65	331.99	360.01	329.23	340.51	360.02	335.25	332.47	303.32	281.79	353.56	353.22	194.37	197.26
d1e79c1	0	0	0	0	0	0	0	0	0	0	0	0	0	356.48	327.57	383.05	336.77	323.7	357.31	356.31	321.75	383.05	355.89	339.53	381.75	354.59	334.81	381.72	358.11	328.45	382.48	355.03	339.81	381.94	358.17	328.4	382.53	348.94	328.62	354.31	352.89	338.44	381.43	328.72	309.09	345.73	346.53	190.82	202.81
d1w0ka1	0	0	0	0	0	0	0	0	0	0	0	0	0	0	329.54	365.41	354.69	329.51	348.3	382.58	329.74	354.15	381.54	342.68	364.91	381.18	335.21	359.43	382.43	329.77	361.73	381.61	342.94	364.77	382.41	329.79	361.53	381.64	329.67	349.22	381.51	343.85	365.67	330.64	309.24	379.34	379.27	204.45	204.23
d1w0kb1	0	0	0	0	0	0	0	0	0	0	0	0	0	0	0	327.69	332.25	358.37	329.35	329.24	357.98	327.89	329.55	329.9	327.52	328.69	329.32	327.61	329.14	358.18	327.38	329.57	329.86	327.55	329.08	358.26	327.43	328.2	357.91	327.86	329.38	329.86	327.41	293.86	270.4	327.89	327.84	170.34	172
d1w0kc1	0	0	0	0	0	0	0	0	0	0	0	0	0	0	0	0	336.56	325.9	357.04	365.36	322.56	383.03	363.66	336.9	382.51	359.89	331.49	382.31	363.84	328.36	382.83	363.07	337.12	382.66	363.75	328.29	382.87	355.28	328.42	354.1	358.23	335.52	382.26	333.44	312.58	347.91	348.92	190.86	203.35
d1h8ea1	0	0	0	0	0	0	0	0	0	0	0	0	0	0	0	0	0	332.76	338.15	354.69	332.8	341.37	354.3	334.01	340.71	353.76	328.62	337.34	354.47	332.66	335.84	354.37	334.3	340.66	354.56	332.7	335.76	353.4	332.23	345.06	354.19	333.93	340.82	304.93	279.21	352.49	352.57	191.68	194.82
d1h8eb1	0	0	0	0	0	0	0	0	0	0	0	0	0	0	0	0	0	0	326.57	329.93	358.61	328.16	330.14	330.41	327.78	329.23	329.7	327.09	329.85	358.25	324.72	330.24	330.45	327.79	329.79	358.38	325.04	328.8	357.97	328.28	330.27	330.4	327.62	292.63	269.85	328.27	328.09	169.95	172.97
d1h8ec1	0	0	0	0	0	0	0	0	0	0	0	0	0	0	0	0	0	0	0	349.38	324.45	356.91	345.08	322.94	356.86	341.06	320.09	355.97	347.42	330.32	357	344.21	322.71	356.9	346.16	330.3	357	338.66	330.25	355.93	344.08	323.47	356.48	324.17	300.22	344.3	344.73	189.95	198.74
d1e1ra1	0	0	0	0	0	0	0	0	0	0	0	0	0	0	0	0	0	0	0	0	330.44	354.59	382.68	341.03	367.75	382.44	331.2	361.07	383.26	330.27	363.02	382.78	341.27	367.49	383.23	330.31	362.84	382.02	329.99	350.01	382.62	341.54	367.94	333.79	309.9	380.77	380.71	202.48	203.67
d1e1rb1	0	0	0	0	0	0	0	0	0	0	0	0	0	0	0	0	0	0	0	0	0	324.85	330.54	330.49	325.65	330.33	330.61	327.55	330.37	358.96	321.74	330.69	330.57	327.99	330.35	359.06	321.87	329.34	358.41	325.03	330.58	330.46	325.05	289.4	265.61	328.63	328.41	172.55	174.52
d1e1rc1	0	0	0	0	0	0	0	0	0	0	0	0	0	0	0	0	0	0	0	0	0	0	354.61	340.07	382.1	354.8	337.62	382.46	357.32	329.01	383.25	353.81	340.17	382.34	357.4	328.96	383.25	348.86	329.1	354.48	351.14	338.88	381.74	327.06	305.49	346.45	345.28	190.46	200.52
d1bmfa1	0	0	0	0	0	0	0	0	0	0	0	0	0	0	0	0	0	0	0	0	0	0	0	343.5	366.74	382.07	334.24	361.34	382.16	330.49	362.6	383.91	343.65	366.88	382.07	330.52	362.33	380.94	330.13	354.41	383.81	343.64	367.52	328.49	309.73	381.42	381.41	199.7	201.91
d1bmfb1	0	0	0	0	0	0	0	0	0	0	0	0	0	0	0	0	0	0	0	0	0	0	0	0	333.83	337.13	381.03	338.53	343.21	330.49	337.75	342.83	383.92	334.39	342.86	330.49	338.66	337.66	330.15	331.02	341.54	383.74	334.02	304.03	280.37	332.92	332.93	186.13	184.08
d1bmfc1	0	0	0	0	0	0	0	0	0	0	0	0	0	0	0	0	0	0	0	0	0	0	0	0	0	366.86	325.68	382.02	366.6	328.23	382.65	366.37	334.13	383.91	366.48	328.18	382.71	361.59	328.21	353.92	364.81	331.84	383.83	330.43	306.72	352.97	353.97	191.12	202.22
d1nbma1	0	0	0	0	0	0	0	0	0	0	0	0	0	0	0	0	0	0	0	0	0	0	0	0	0	0	329.83	360.79	382.04	330.19	359.09	382.14	337.42	367.17	382.05	330.21	358.77	381.73	329.96	354.3	382.2	337.37	367.74	328.67	309.98	380.32	380.28	198.13	200.33
d1nbmb1	0	0	0	0	0	0	0	0	0	0	0	0	0	0	0	0	0	0	0	0	0	0	0	0	0	0	0	335.86	333.98	330.63	335.52	333.72	381.07	327.21	333.59	330.64	335.63	328.79	330.53	319.78	332.46	380.41	325.06	286.12	261.85	327.89	327.67	177.65	180.67
d1nbmc1	0	0	0	0	0	0	0	0	0	0	0	0	0	0	0	0	0	0	0	0	0	0	0	0	0	0	0	0	360.44	327.82	382.83	359.37	338.69	382.22	360.31	327.72	382.78	355.17	327.84	352.93	355.88	336.28	381.78	326.07	302.34	341.46	344.4	193.88	202.46
d1e1qa1	0	0	0	0	0	0	0	0	0	0	0	0	0	0	0	0	0	0	0	0	0	0	0	0	0	0	0	0	0	330.29	362.16	382.3	343.48	366.48	383.94	330.34	361.96	382.34	330.07	350.03	382.04	343.46	366.8	331.55	308.35	380.02	379.84	203.71	203.29
d1e1qb1	0	0	0	0	0	0	0	0	0	0	0	0	0	0	0	0	0	0	0	0	0	0	0	0	0	0	0	0	0	0	328.42	330.66	330.54	328.32	330.2	359.95	328.5	328.97	359.3	328.58	330.52	330.42	328.1	294.28	271.74	328.75	328.45	171.96	176.06
d1e1qc1	0	0	0	0	0	0	0	0	0	0	0	0	0	0	0	0	0	0	0	0	0	0	0	0	0	0	0	0	0	0	0	362.17	337.63	382.83	362.12	328.37	383.94	355.43	328.45	354.65	356.6	337.32	382.35	328.4	305.85	344.8	345.47	192.48	202.67
d1efra1	0	0	0	0	0	0	0	0	0	0	0	0	0	0	0	0	0	0	0	0	0	0	0	0	0	0	0	0	0	0	0	0	342.99	366.54	382.22	330.68	361.91	381.11	330.34	352.77	383.79	343.04	367.15	329.49	311.3	381.44	381.41	199.79	201.89
d1efrb1	0	0	0	0	0	0	0	0	0	0	0	0	0	0	0	0	0	0	0	0	0	0	0	0	0	0	0	0	0	0	0	0	0	334.7	343.15	330.55	338.01	338	330.2	331.2	341.73	383.7	334.34	303.88	278.08	333.08	333.13	186.1	184.56
d1efrc1	0	0	0	0	0	0	0	0	0	0	0	0	0	0	0	0	0	0	0	0	0	0	0	0	0	0	0	0	0	0	0	0	0	0	366.36	328.26	382.86	361.76	328.29	353.87	364.97	332.37	383.82	330.52	309.02	352.32	353.36	190.96	202.02
d1h8ha1	0	0	0	0	0	0	0	0	0	0	0	0	0	0	0	0	0	0	0	0	0	0	0	0	0	0	0	0	0	0	0	0	0	0	0	330.26	361.94	382.33	330.01	349.62	381.98	343.12	366.64	328.75	306.86	379.85	379.61	203.58	203.52
d1h8hb1	0	0	0	0	0	0	0	0	0	0	0	0	0	0	0	0	0	0	0	0	0	0	0	0	0	0	0	0	0	0	0	0	0	0	0	0	328.45	329.06	359.28	328.53	330.54	330.42	328.04	295.16	271.12	328.73	328.45	172.23	176.25
d1h8hc1	0	0	0	0	0	0	0	0	0	0	0	0	0	0	0	0	0	0	0	0	0	0	0	0	0	0	0	0	0	0	0	0	0	0	0	0	0	355.27	328.5	354.67	356.36	337.45	382.37	327.07	305.48	344.73	345.46	192.31	202.63
d1ohha1	0	0	0	0	0	0	0	0	0	0	0	0	0	0	0	0	0	0	0	0	0	0	0	0	0	0	0	0	0	0	0	0	0	0	0	0	0	0	329.03	348.85	381.05	338.02	362.07	327.14	298.79	379.31	379.3	200.59	198.73
d1ohhb1	0	0	0	0	0	0	0	0	0	0	0	0	0	0	0	0	0	0	0	0	0	0	0	0	0	0	0	0	0	0	0	0	0	0	0	0	0	0	0	328.75	330.17	330.04	328.06	293.52	270.17	327.98	327.58	172.5	176.37
d1ohhc1	0	0	0	0	0	0	0	0	0	0	0	0	0	0	0	0	0	0	0	0	0	0	0	0	0	0	0	0	0	0	0	0	0	0	0	0	0	0	0	0	352.17	329.94	353.72	324.2	298.56	346.08	346.31	194.38	196.77
d1cowa1	0	0	0	0	0	0	0	0	0	0	0	0	0	0	0	0	0	0	0	0	0	0	0	0	0	0	0	0	0	0	0	0	0	0	0	0	0	0	0	0	0	341.97	365.94	331.17	310.54	381.2	381.21	199.78	201.42
d1cowb1	0	0	0	0	0	0	0	0	0	0	0	0	0	0	0	0	0	0	0	0	0	0	0	0	0	0	0	0	0	0	0	0	0	0	0	0	0	0	0	0	0	0	332.07	307.19	278.97	332.9	332.84	186.14	183.71
d1cowc1	0	0	0	0	0	0	0	0	0	0	0	0	0	0	0	0	0	0	0	0	0	0	0	0	0	0	0	0	0	0	0	0	0	0	0	0	0	0	0	0	0	0	0	332.37	308	351.25	352.37	190.47	202.52
d1maba1	0	0	0	0	0	0	0	0	0	0	0	0	0	0	0	0	0	0	0	0	0	0	0	0	0	0	0	0	0	0	0	0	0	0	0	0	0	0	0	0	0	0	0	0	358.52	323.12	320.91	161.85	164.33
d2f43a1	0	0	0	0	0	0	0	0	0	0	0	0	0	0	0	0	0	0	0	0	0	0	0	0	0	0	0	0	0	0	0	0	0	0	0	0	0	0	0	0	0	0	0	0	0	301.91	301.47	157.56	162.99
d1fx0a1	0	0	0	0	0	0	0	0	0	0	0	0	0	0	0	0	0	0	0	0	0	0	0	0	0	0	0	0	0	0	0	0	0	0	0	0	0	0	0	0	0	0	0	0	0	0	383.56	201.3	202.37
d1kmha1	0	0	0	0	0	0	0	0	0	0	0	0	0	0	0	0	0	0	0	0	0	0	0	0	0	0	0	0	0	0	0	0	0	0	0	0	0	0	0	0	0	0	0	0	0	0	0	201.69	202.03
d1skye1	0	0	0	0	0	0	0	0	0	0	0	0	0	0	0	0	0	0	0	0	0	0	0	0	0	0	0	0	0	0	0	0	0	0	0	0	0	0	0	0	0	0	0	0	0	0	0	0	326.38
d1w0jd1	0	0	0	0	0	0	0	0	0	0	0	0	0	0	0	0	0	0	0	0	0	0	0	0	0	0	0	0	0	0	0	0	0	0	0	0	0	0	0	0	0	0	0	0	0	0	0	0	0
d1w0je1	0	0	0	0	0	0	0	0	0	0	0	0	0	0	0	0	0	0	0	0	0	0	0	0	0	0	0	0	0	0	0	0	0	0	0	0	0	0	0	0	0	0	0	0	0	0	0	0	0
d1w0jf1	0	0	0	0	0	0	0	0	0	0	0	0	0	0	0	0	0	0	0	0	0	0	0	0	0	0	0	0	0	0	0	0	0	0	0	0	0	0	0	0	0	0	0	0	0	0	0	0	0
d1e79d1	0	0	0	0	0	0	0	0	0	0	0	0	0	0	0	0	0	0	0	0	0	0	0	0	0	0	0	0	0	0	0	0	0	0	0	0	0	0	0	0	0	0	0	0	0	0	0	0	0
d1e79e1	0	0	0	0	0	0	0	0	0	0	0	0	0	0	0	0	0	0	0	0	0	0	0	0	0	0	0	0	0	0	0	0	0	0	0	0	0	0	0	0	0	0	0	0	0	0	0	0	0
d1e79f1	0	0	0	0	0	0	0	0	0	0	0	0	0	0	0	0	0	0	0	0	0	0	0	0	0	0	0	0	0	0	0	0	0	0	0	0	0	0	0	0	0	0	0	0	0	0	0	0	0
d1w0kd1	0	0	0	0	0	0	0	0	0	0	0	0	0	0	0	0	0	0	0	0	0	0	0	0	0	0	0	0	0	0	0	0	0	0	0	0	0	0	0	0	0	0	0	0	0	0	0	0	0
d1w0ke1	0	0	0	0	0	0	0	0	0	0	0	0	0	0	0	0	0	0	0	0	0	0	0	0	0	0	0	0	0	0	0	0	0	0	0	0	0	0	0	0	0	0	0	0	0	0	0	0	0
d1w0kf1	0	0	0	0	0	0	0	0	0	0	0	0	0	0	0	0	0	0	0	0	0	0	0	0	0	0	0	0	0	0	0	0	0	0	0	0	0	0	0	0	0	0	0	0	0	0	0	0	0
d1h8ed1	0	0	0	0	0	0	0	0	0	0	0	0	0	0	0	0	0	0	0	0	0	0	0	0	0	0	0	0	0	0	0	0	0	0	0	0	0	0	0	0	0	0	0	0	0	0	0	0	0
d1h8ee1	0	0	0	0	0	0	0	0	0	0	0	0	0	0	0	0	0	0	0	0	0	0	0	0	0	0	0	0	0	0	0	0	0	0	0	0	0	0	0	0	0	0	0	0	0	0	0	0	0
d1h8ef1	0	0	0	0	0	0	0	0	0	0	0	0	0	0	0	0	0	0	0	0	0	0	0	0	0	0	0	0	0	0	0	0	0	0	0	0	0	0	0	0	0	0	0	0	0	0	0	0	0
d1e1rd1	0	0	0	0	0	0	0	0	0	0	0	0	0	0	0	0	0	0	0	0	0	0	0	0	0	0	0	0	0	0	0	0	0	0	0	0	0	0	0	0	0	0	0	0	0	0	0	0	0
d1e1re1	0	0	0	0	0	0	0	0	0	0	0	0	0	0	0	0	0	0	0	0	0	0	0	0	0	0	0	0	0	0	0	0	0	0	0	0	0	0	0	0	0	0	0	0	0	0	0	0	0
d1e1rf1	0	0	0	0	0	0	0	0	0	0	0	0	0	0	0	0	0	0	0	0	0	0	0	0	0	0	0	0	0	0	0	0	0	0	0	0	0	0	0	0	0	0	0	0	0	0	0	0	0
d1bmfd1	0	0	0	0	0	0	0	0	0	0	0	0	0	0	0	0	0	0	0	0	0	0	0	0	0	0	0	0	0	0	0	0	0	0	0	0	0	0	0	0	0	0	0	0	0	0	0	0	0
d1bmfe1	0	0	0	0	0	0	0	0	0	0	0	0	0	0	0	0	0	0	0	0	0	0	0	0	0	0	0	0	0	0	0	0	0	0	0	0	0	0	0	0	0	0	0	0	0	0	0	0	0
d1bmff1	0	0	0	0	0	0	0	0	0	0	0	0	0	0	0	0	0	0	0	0	0	0	0	0	0	0	0	0	0	0	0	0	0	0	0	0	0	0	0	0	0	0	0	0	0	0	0	0	0
d1nbmd1	0	0	0	0	0	0	0	0	0	0	0	0	0	0	0	0	0	0	0	0	0	0	0	0	0	0	0	0	0	0	0	0	0	0	0	0	0	0	0	0	0	0	0	0	0	0	0	0	0
d1nbme1	0	0	0	0	0	0	0	0	0	0	0	0	0	0	0	0	0	0	0	0	0	0	0	0	0	0	0	0	0	0	0	0	0	0	0	0	0	0	0	0	0	0	0	0	0	0	0	0	0
d1nbmf1	0	0	0	0	0	0	0	0	0	0	0	0	0	0	0	0	0	0	0	0	0	0	0	0	0	0	0	0	0	0	0	0	0	0	0	0	0	0	0	0	0	0	0	0	0	0	0	0	0
d1e1qd1	0	0	0	0	0	0	0	0	0	0	0	0	0	0	0	0	0	0	0	0	0	0	0	0	0	0	0	0	0	0	0	0	0	0	0	0	0	0	0	0	0	0	0	0	0	0	0	0	0
d1e1qe1	0	0	0	0	0	0	0	0	0	0	0	0	0	0	0	0	0	0	0	0	0	0	0	0	0	0	0	0	0	0	0	0	0	0	0	0	0	0	0	0	0	0	0	0	0	0	0	0	0
d1e1qf1	0	0	0	0	0	0	0	0	0	0	0	0	0	0	0	0	0	0	0	0	0	0	0	0	0	0	0	0	0	0	0	0	0	0	0	0	0	0	0	0	0	0	0	0	0	0	0	0	0
d1efrd1	0	0	0	0	0	0	0	0	0	0	0	0	0	0	0	0	0	0	0	0	0	0	0	0	0	0	0	0	0	0	0	0	0	0	0	0	0	0	0	0	0	0	0	0	0	0	0	0	0
d1efre1	0	0	0	0	0	0	0	0	0	0	0	0	0	0	0	0	0	0	0	0	0	0	0	0	0	0	0	0	0	0	0	0	0	0	0	0	0	0	0	0	0	0	0	0	0	0	0	0	0
d1efrf1	0	0	0	0	0	0	0	0	0	0	0	0	0	0	0	0	0	0	0	0	0	0	0	0	0	0	0	0	0	0	0	0	0	0	0	0	0	0	0	0	0	0	0	0	0	0	0	0	0
d1h8hd1	0	0	0	0	0	0	0	0	0	0	0	0	0	0	0	0	0	0	0	0	0	0	0	0	0	0	0	0	0	0	0	0	0	0	0	0	0	0	0	0	0	0	0	0	0	0	0	0	0
d1h8he1	0	0	0	0	0	0	0	0	0	0	0	0	0	0	0	0	0	0	0	0	0	0	0	0	0	0	0	0	0	0	0	0	0	0	0	0	0	0	0	0	0	0	0	0	0	0	0	0	0
d1h8hf1	0	0	0	0	0	0	0	0	0	0	0	0	0	0	0	0	0	0	0	0	0	0	0	0	0	0	0	0	0	0	0	0	0	0	0	0	0	0	0	0	0	0	0	0	0	0	0	0	0
d1ohhd1	0	0	0	0	0	0	0	0	0	0	0	0	0	0	0	0	0	0	0	0	0	0	0	0	0	0	0	0	0	0	0	0	0	0	0	0	0	0	0	0	0	0	0	0	0	0	0	0	0
d1ohhe1	0	0	0	0	0	0	0	0	0	0	0	0	0	0	0	0	0	0	0	0	0	0	0	0	0	0	0	0	0	0	0	0	0	0	0	0	0	0	0	0	0	0	0	0	0	0	0	0	0
d1ohhf1	0	0	0	0	0	0	0	0	0	0	0	0	0	0	0	0	0	0	0	0	0	0	0	0	0	0	0	0	0	0	0	0	0	0	0	0	0	0	0	0	0	0	0	0	0	0	0	0	0
d1cowd1	0	0	0	0	0	0	0	0	0	0	0	0	0	0	0	0	0	0	0	0	0	0	0	0	0	0	0	0	0	0	0	0	0	0	0	0	0	0	0	0	0	0	0	0	0	0	0	0	0
d1cowe1	0	0	0	0	0	0	0	0	0	0	0	0	0	0	0	0	0	0	0	0	0	0	0	0	0	0	0	0	0	0	0	0	0	0	0	0	0	0	0	0	0	0	0	0	0	0	0	0	0
d1cowf1	0	0	0	0	0	0	0	0	0	0	0	0	0	0	0	0	0	0	0	0	0	0	0	0	0	0	0	0	0	0	0	0	0	0	0	0	0	0	0	0	0	0	0	0	0	0	0	0	0
d2jdid1	0	0	0	0	0	0	0	0	0	0	0	0	0	0	0	0	0	0	0	0	0	0	0	0	0	0	0	0	0	0	0	0	0	0	0	0	0	0	0	0	0	0	0	0	0	0	0	0	0
d2jdie1	0	0	0	0	0	0	0	0	0	0	0	0	0	0	0	0	0	0	0	0	0	0	0	0	0	0	0	0	0	0	0	0	0	0	0	0	0	0	0	0	0	0	0	0	0	0	0	0	0
d2jdif1	0	0	0	0	0	0	0	0	0	0	0	0	0	0	0	0	0	0	0	0	0	0	0	0	0	0	0	0	0	0	0	0	0	0	0	0	0	0	0	0	0	0	0	0	0	0	0	0	0
d2ck3d1	0	0	0	0	0	0	0	0	0	0	0	0	0	0	0	0	0	0	0	0	0	0	0	0	0	0	0	0	0	0	0	0	0	0	0	0	0	0	0	0	0	0	0	0	0	0	0	0	0
d2ck3e1	0	0	0	0	0	0	0	0	0	0	0	0	0	0	0	0	0	0	0	0	0	0	0	0	0	0	0	0	0	0	0	0	0	0	0	0	0	0	0	0	0	0	0	0	0	0	0	0	0
d2ck3f1	0	0	0	0	0	0	0	0	0	0	0	0	0	0	0	0	0	0	0	0	0	0	0	0	0	0	0	0	0	0	0	0	0	0	0	0	0	0	0	0	0	0	0	0	0	0	0	0	0
d1mabb1	0	0	0	0	0	0	0	0	0	0	0	0	0	0	0	0	0	0	0	0	0	0	0	0	0	0	0	0	0	0	0	0	0	0	0	0	0	0	0	0	0	0	0	0	0	0	0	0	0
d2f43b1	0	0	0	0	0	0	0	0	0	0	0	0	0	0	0	0	0	0	0	0	0	0	0	0	0	0	0	0	0	0	0	0	0	0	0	0	0	0	0	0	0	0	0	0	0	0	0	0	0
d1fx0b1	0	0	0	0	0	0	0	0	0	0	0	0	0	0	0	0	0	0	0	0	0	0	0	0	0	0	0	0	0	0	0	0	0	0	0	0	0	0	0	0	0	0	0	0	0	0	0	0	0
d1kmhb1	0	0	0	0	0	0	0	0	0	0	0	0	0	0	0	0	0	0	0	0	0	0	0	0	0	0	0	0	0	0	0	0	0	0	0	0	0	0	0	0	0	0	0	0	0	0	0	0	0
		red		blue
	red	min	248.1	min	99.68
		max	383.94	max	217.52
	blue			min	171.54
				max	335.98
[truncated: 45 more columns]
